# Supplementary material for: Self-assembly of a biodegradable branched PE-PCL-b-PEC amphiphilic polymer: synthesis, characterization and targeted delivery of doxorubicin to cancer cells
Source: Royal Society of Chemistry journal article supplement (doi:10.1039/c4ra08351b), 2014-09-30
Supplement: c4ra08351b1.pdf [file c4ra08351b1.pdf]

## Supporting information for “Self-assembly of biodegradable branched PEPCL-b-PEC amphiphilic polymer: synthesis, characterization and cancer cell targeted drug delivery”

S. Panja,<sup>a</sup> S. Nayak,<sup>b</sup> S. K. Ghosh<sup>b</sup>, M. Selvakumar<sup>a</sup> and S. Chattopadhyay<sup>\*a</sup>

<sup>a</sup> Rubber Technology Centre, Indian Institute of Technology, Kharagpur-721302, India

<sup>b</sup> Department of Biotechnology, Indian Institute of Technology, Kharagpur-721302, India

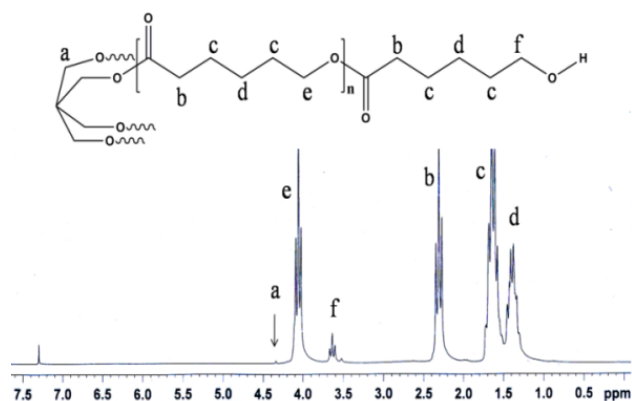

**Figure S1:** <sup>1</sup>H NMR spectrum of branch PE-PCL in CDCl<sub>3</sub>.

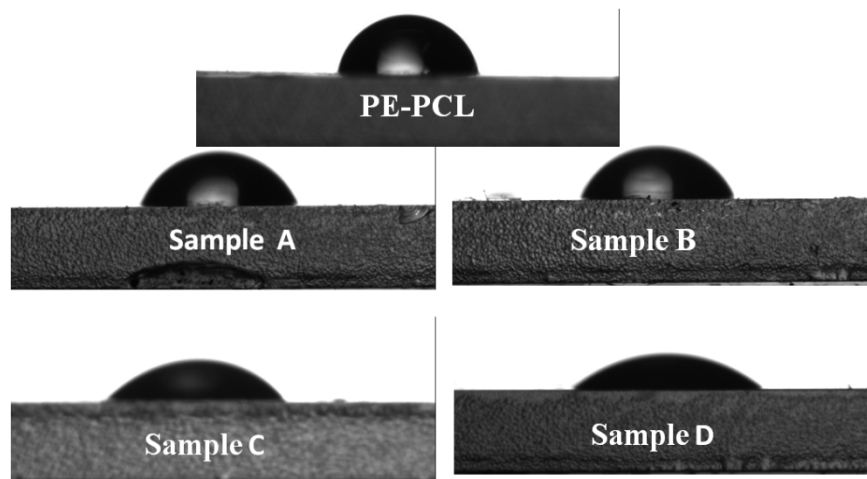

**Figure S2:** Water contact angle of PE-PCL (77°), Sample A (71°), Sample B (67°), Sample C (59°) and Sample D (55°).

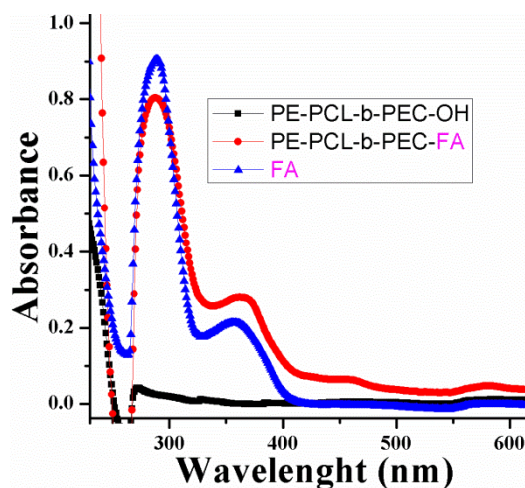

**Figure S3:** UV absorption spectra of folic acid (FA), PE-PCL-b-PEC and PE-PCL-b-PEC-FA.

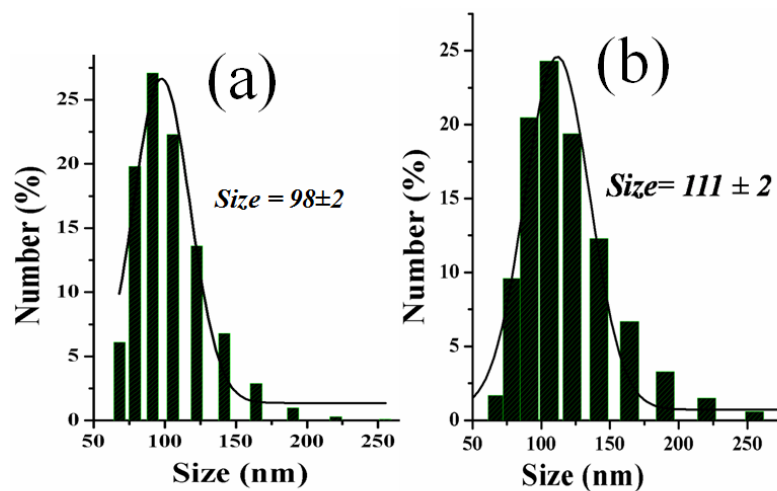

**Figure 4:** DLS histogram of (a) blank and (b) DOX loaded polymeric micelle with standard deviation.

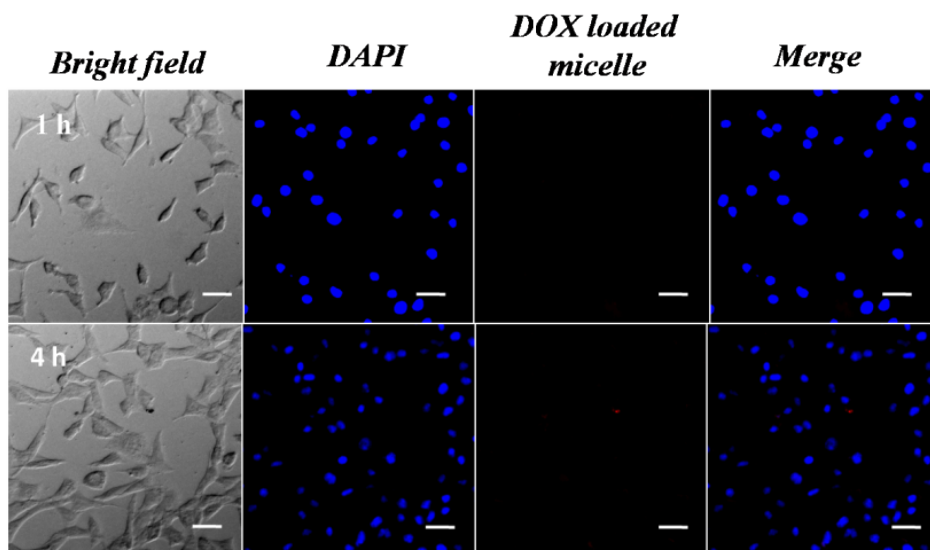

**Figure S5:** Fluorescence microscopic image of L929 cell treated with DOX loaded polymeric micelle with a scale bar of 40 $\mu$ m.

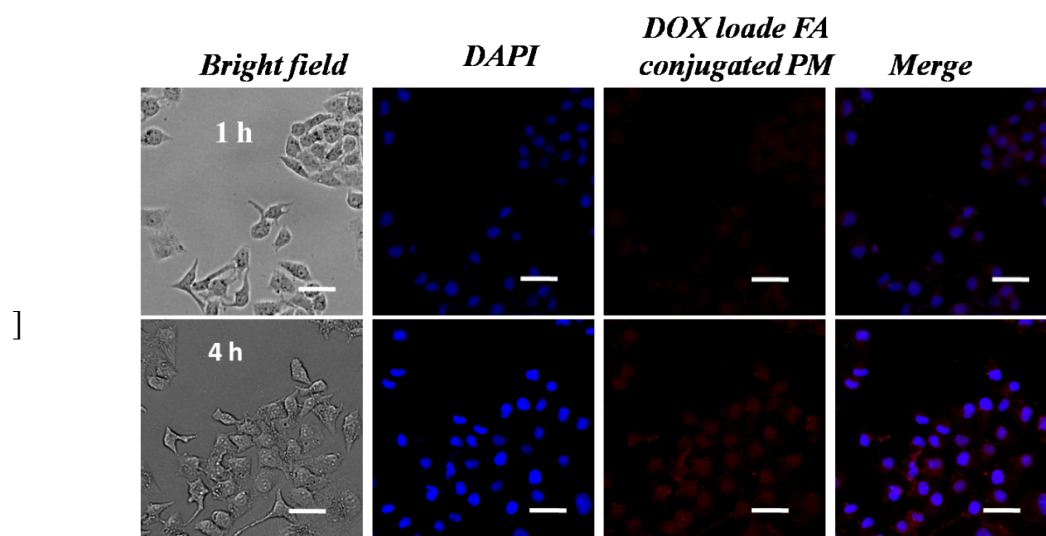

**Figure S6:** Fluorescence microscopic image of HeLa cell treated with FA conjugated, DOX loaded PM with a scale bar of 40 $\mu$ m.

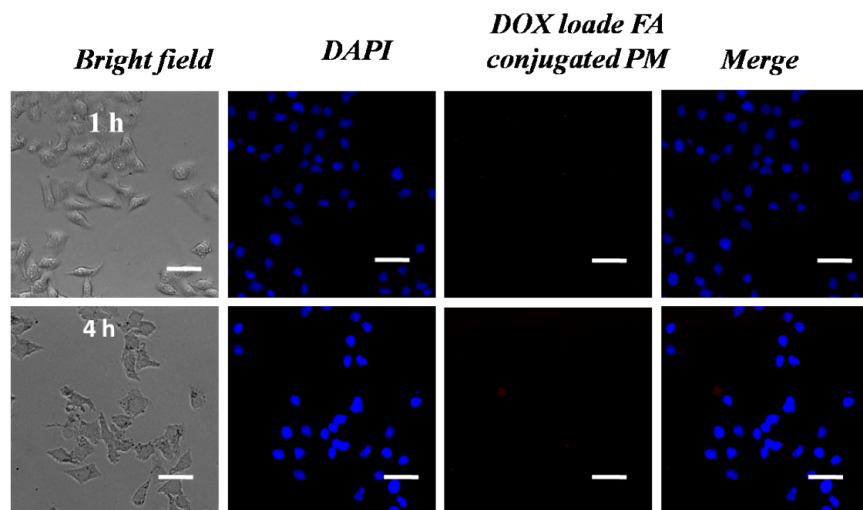

**Figure S7:** Fluorescence microscopic image of HeLa cell treated with FA unconjugated DOX loaded PM with a scale bar of 40 $\mu$ m.
